# Supplementary material for: Biogeochemical versus biogeophysical temperature effects of historical land-use change in CMIP6
Source: Copernicus journal article supplement (doi:10.5194/egusphere-2024-2460), 2024-08-27
Supplement: Supplementary file [file egusphere-2024-2460-AC2-supplement.pdf]

## Response to Reviewer #2

### General Comments

This paper updates estimates of the biogeochemical and biogeophysical effects of land use change on surface temperature using CMIP6 output. They find large differences in estimated temperature effects across models, and generally similar magnitudes to prior work.

Overall, I find the main conclusions of the paper are somewhat buried. The text is very long, and the main take-home points are not very clear within the paper as a whole. There is extensive comparison with prior similar estimates and recapping of prior literature, but I didn't come away with an understanding for what was learned through this work specifically that wasn't already in previous work. This was especially the case in the discussion section. I understand that this paper uses different simulations than prior work, but what other insights the authors present that were not covered by previous literature I am unsure. I say this as someone slightly outside of the land use change sphere, where the detailed findings in the field are less known to me. I encourage the authors to make their specific contributions more clear in a revised version.

There are a lot of acronyms in this paper! (LUC, BGP, BGC, ESM, SNR, A/R, GHG, RGRT, TCRE, DGVM, all of the model names, etc). There is a lot to keep track of, especially for anyone not well embedded in this discipline. I suggest picking as few as you can that used extensively and spelling the rest out. For example, A/R, SNR, RGRT don't seem necessary as acronyms to me. Remove any you can reasonably remove to help out your readers!

**Response:** *Thank you for your feedback and the need to emphasise the novelty of our study. We have revised our discussion and conclusion sections to ensure the key messages are captured. At the beginning of each discussion section, we first highlight our novel contribution before expanding upon it in the following paragraphs. E.g.,*

#### *4.1. Disparity in estimates of near-surface air temperature across ESMs*

*“In highlighting the disparity across model estimates of near-surface temperature, we show that our findings align with previous studies in some aspects but also uncover critical deviations, particularly in the stronger BGC-induced warming observed in specific models. Unlike prior single-model studies or simplified model intercomparisons, we integrate multi-model analyses, spatial variability, and mechanistic insights into both regional and global BGP-BGC effects. Notably, we highlight how regional patterns—such as cooling over mid-latitudes and warming in the tropics—are shaped by complex interactions between BGP and BGC effects, including local and non-local feedbacks. While the global BGC-induced warming aligns with IPCC estimates and prior studies, the magnitude varies with LUC implementation details, such as gross vs. net transitions and forest cover representation. The BGP effects show greater inter-model disparity, largely influenced by differences in how vegetation fractions (e.g., tree cover) are modelled, affecting energy balance, albedo, and evapotranspiration. We expatiate on these findings below.”*

*We repeat the same for subsections*

#### 4.2 Regional variability in BGP vs BGC effects on near-surface air temperature

*“Results from our analysis in Sect. 3.3 confirm heterogeneous BGP effects, where LUC imprints on the temperature pattern, and homogeneous BGC effects. We provide summaries for more regions, with more models, than previous studies. Such regional information is important to anticipate how a region will be affected by LUC - important to know what to adapt to. In NAM for example - almost all models (more than in studies before, and with better LUC description and more processes) agree on the cooling, on average by 0.5 degrees. Given LUC needs to adapt to climate change, CDR needs and world economy, it is important to factor such benefits in to avoid bad surprises.”*

and

#### 4.3. Variability across models' estimates of land-use change carbon emissions

*“The variability in LUC-induced carbon emissions across ESMs reveals factors driving differences, including gross versus net transitions (Bayer et al., 2017; Bastos et al., 2022), initial carbon pool conditions (Boysen et al., 2021; Exbrayat et al., 2014), and model-specific treatments of factors like wood harvest (Hartung et al., 2021; Stocker et al., 2014) and irrigation (Qin et al., 2024; Roy et al., 2022). Our study builds on earlier work by quantifying the influence of these factors and examines their interactions in a multi-model framework using the latest ESMs complemented by a survey across modelling teams. Regional patterns confirm carbon losses in tropical regions due to deforestation (Zhu et al., 2023; Matricardi et al., 2020) and gains in Europe from land abandonment and regrowth (Ganzenmüller et al., 2022). Notably, gross transitions amplify flux estimates by capturing bidirectional land-use changes, while model-specific changes point to additional influences like irrigation and pre-industrial conditions (Melnikova et al., 2022). We therefore highlight the complexities of simulating LUC impacts and the critical need for harmonised modelling frameworks to improve the reliability and comparability of carbon flux projections across ESMs.”*

To make the paper easier to read, we have removed the acronyms A/R, RGRT, and SNR

### Specific comments:

1. Line 70: "local and non-local temperature changes" There is additional literature on this that is relevant, for example Laguë et al. 2019.

**Response:** *Thank you for your suggestion. We have added the literature to the list of references.*

2. Line 309 - not clear how "RGRT" relates to the equations shown.

**Response:** *Thank you for pointing this out. The RGRT, now written in full as the “regional-to-global ratio of temperature”, at each grid cell, represents the ratio (a) of regional to global temperature change in that particular grid cell. It is used here to designate the rate of change of regional to global temperature, a model and grid cell-dependent metric.*

3. Line 331, equation7: I find this equation confusing to interpret. The authors acknowledge elsewhere in the manuscript that there are non-local effects of land cover change and that that this metric can't capture them because the temperature change in a single gridcell may be comprised already of both local and non-local impacts from land use change. Why then call it T<sub>local</sub>? I'd suggest calling it something else that more accurately describes what it represents.

**Response:** *Thank you for pointing this out. We have renamed the variable to better reflect that it also includes non-local effects for BGP. Equation 7 now reads as  $T^{grid}$  which for both BGC and BGP. In the text, we explain that  $T^{grid}$  for BGC comprises only the local effects,  $T^{grid}$  for BGP comprises both the local and non-local effect.*

4. Line 358: "form a distinct cluster" - I do not see anything visually obvious like this in Figure 1. Needs further illustration or description.

**Response:** *Thank you for pointing this out. We have now clarified our response to read "In examining the trajectories of total land carbon change,  $\Delta c_{Land}$ , we reveal considerable variation in how ESMs simulate changes in land CO<sub>2</sub> fluxes (Fig. 1a). This suggests that differences in  $\Delta c_{Land}$  trajectories are not directly relatable to differences in the implementation of LUC processes across models. Yet, the annual LUC emissions of CMCC, IPSL, and UKESM are very similar (Fig 1c), which might reflect that these models share a common approach by implementing net sub-grid transitions and simulating grasslands, but they do not represent pasture or grazing. For instance, sub-grid transitions allow models to account for mixed land-use types within a grid cell more precisely, leading to refined estimates of land carbon fluxes in areas where land use transitions over time. Moreover, focusing on grassland ecosystems rather than pasture or grazing may standardise the carbon flux response in these models, as grasslands generally have different carbon storage and release patterns than managed lands like pastures. Consequently, these shared characteristics could explain the observed alignment in land CO<sub>2</sub> flux trajectories by promoting a similar response to LUC across these models."*

5. Line 360: "likely leads to similar trajectories" why? Please provide evidence and a hypothesis.

**Response:** *We address these concerns in the earlier comment via a dedicated paragraph.*

6. Line 411: "across dynamic global vegetation models" do the authors mean TRENDY models? This is a confusing change of language, and additionally I don't think all TRENDY models are DGVMs - do the authors mean a subset of TRENDY?

**Response:** *Thank you for pointing out the confusion that could arise from this. We follow the terminology used by the TRENDY team themselves, which describes all the participating models as DGVMs (see Sitch et al., 2024, doi:10.1029/2024GB008102), irrespective of whether a dynamic biogeographical module is switched on or not (if this is what the reviewer alludes with their question of whether all the models are DGVMs). We have extended our text to clarify the terminology:*

*“[...] we compare [...] with estimates of dynamic global vegetation models (DGVMs) from the “Trends and drivers of the regional-scale sources and sinks of carbon dioxide” (TRENDY v11; Sitch et al., 2015) simulations”*

7. Line 450-451: see additional papers on how plant feedbacks with changing CO<sub>2</sub> can amplify warming in high latitudes - Park et al. 2020 and Park et al., 2021. I think this literature is highly relevant to understanding the BGP effects of land use change.

**Response:** *Thank you for recommending the papers by Park et al. (2020, 2021) regarding CO<sub>2</sub> physiological forcing and its implications for high-latitude warming. These studies provide valuable insights into the role of plant feedback in amplifying warming, particularly under CO<sub>2</sub> physiological forcing scenarios. However, our paper specifically addresses the effects of land-use change (LUC) forcing on biogeophysical (BGP) and biogeochemical (BGC) processes, which follow a different mechanism than the CO<sub>2</sub> physiological forcing examined in these studies. While we acknowledge that the role of plant feedback is an important and related area of research, the processes driving BGP and BGC effects under LUC are distinct from those associated with CO<sub>2</sub> physiological feedback. For this reason, we believe that a detailed discussion of CO<sub>2</sub> physiological forcing falls outside the primary scope of our analysis focused on LUC-driven effects.*

8. Figures 2-4: I suggest that the authors make the signal to noise ratio and inter-model agreement plots on a different color bar from the quantities being plotted (T, carbon) and the same colorbar for signal to noise ratio and inter-model agreement on all three plots. It is confusing to have it plotted in the same colorbar but showing a different unit.

**Response:** *Thank you for your suggestions to improve clarity. We have modified Figures 2-4 as suggested, using a different colormap for the signal-to-noise ratio and the inter-model agreement. An example is shown below for Figure 2.*

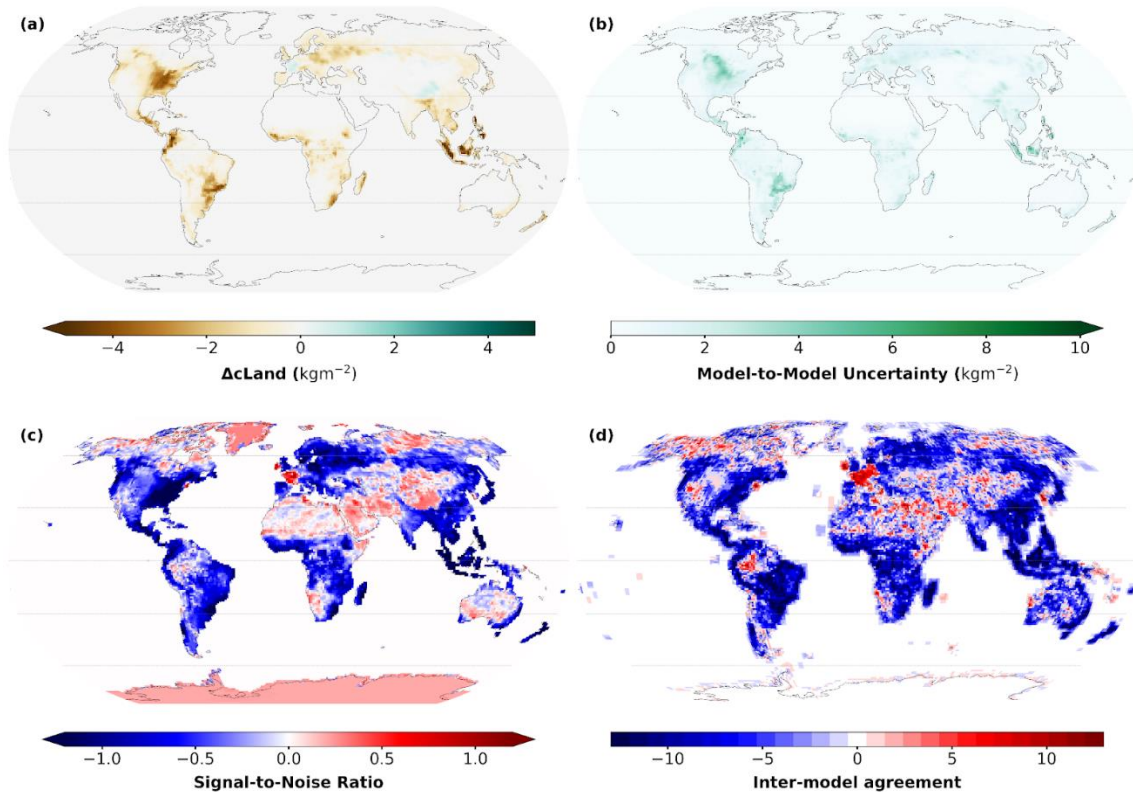

**Figure 2.** Change in total land carbon pools ( $\Delta c_{Land}$ ) as (a) the multi-model mean, (b) the inter-model spread, (c) the signal-to-noise ratio, and (d) the inter-model agreement due to biogeochemical effects of land-use change. Results were computed from 13 Earth system models as the cumulative value at the end of the simulation (year 2144). The signal-to-noise ratio (c) indicates the strength of the signal as compared to the inter-model uncertainty. It measures the relative weight of the multi-model mean anomalies in (a) with respect to the model coherence in (b) where a high absolute number means a robust signal. The inter-model agreement on the other hand shows the direction, rather than magnitude, of change for each grid cell (browns: negative/decreasing; greens: positive/increasing) indicating the number of ESMs that agree on the direction (+ or -) of the signal.

9. Line 496-497: "obviously driven foremost by the LUC in that gridcell" Can the authors say why this is obvious?

**Response:** Thank you for highlighting this. We revised the statement to provide clearer justification. The sentence now reads *"While the underlying carbon stock changes in  $\Delta T_{bgc}^{grid}$  are primarily driven by the LUC within the grid cell itself—since direct changes in land cover, vegetation type, and soil management directly affect carbon stocks at the local scale—, the resulting BGP temperature change in each grid cell reflects broader climatic impacts. These include changes in local surface properties (e.g., albedo, evapotranspiration) as well as energy and water vapour changes that may be caused by air transport into the grid cell originating from LUC in other locations."*

To justify these claims, we also added a statement in the methods, section 2.3.3., that reads *"The underlying carbon stock changes in a grid cell are driven foremost by the LUC within that specific grid cell because our experimental setup isolates the effect of LUC by comparing two scenarios: historical and hist-noLu. By design, observed*

differences in carbon stocks in a given grid cell are directly attributable to the local LUC imposed in that cell since this is the only variable altered between the two experiments. Therefore, the primary driver of carbon stock changes in each grid cell is the local LUC, as the experimental approach controls for other influences on carbon stocks.”

10. Line 501: "local BGP effects appear to dominate" How do the authors know that? I don't see evidence for this statement since they just stated that they can't calculate how much is local vs. non-local. Please provide further evidence.

**Response:** Thank you for pointing this out. We have clarified our statement by expanding on the text. The added clarification reads “The pattern of  $\Delta T_{bgp,grid}$  is, therefore, a mixture of local and non-local effects of LUC (Winckler et al., 2019a), and the two effects cannot be separated without additional simulations. However, in regions with extensive LUC (see Figs. S13 - S16), such as areas experiencing substantial changes in vegetation cover or other land surface properties, it is reasonable to hypothesise that local BGP effects could have a more pronounced influence. Large-scale vegetation changes in these regions likely impact surface properties like albedo, evapotranspiration, and surface roughness, which are direct drivers of BGP effects. Thus, while our current approach cannot precisely quantify the local versus non-local contributions to  $\Delta T_{bgp,grid}$  our maps provide an indication of areas where the unintended BGP effects of LUC are most likely significant. It is in this sense that our maps provide some guidance on the unintended effect of LUC in a specific location on global climate via BGP pathways—which again may be indicative of LUC deployed intentionally to dampen climate change; a consideration relevant for evaluating LUC as a strategy for climate mitigation.”

11. Figure 7. I think it would be helpful to label each of the three sections directly on the figure (biogeophysical, biogeochemical, change in carbon stock).

**Response:** In line with comments from other reviewers, we have modified Figure 7, and the new Figure 7 is as below.

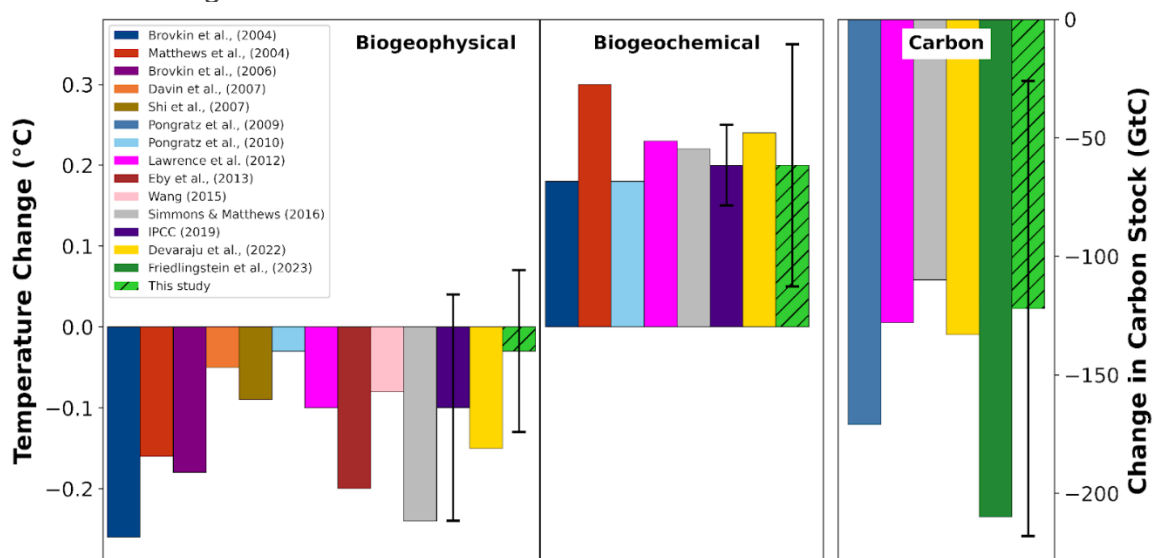

**Figure 7.** Biogeophysical, biogeochemical effects, and changes in carbon stocks quantified in this study (hatched green bars) compared with other studies. Where vertical lines exist, they represent the standard deviation of estimates. See Supplementary Table S2 for the studies and their estimation periods.

12. Line 686: "additional insights" - What about BCC and CESM2 provides insights? It isn't clear.

**Response:** *Thank you for bringing this to our attention. We now provide further explanation to the insight reported in our manuscript. The statement reads "In examining regional variability in LUC effects, the U.S. Great Plains region offers insights into model differences, particularly in  $\Delta c_{\text{Soil}}$  estimates. While models such as BCC and CNRM indicate carbon gain in this region, CESM2 suggests carbon loss. This discrepancy highlights model-specific assumptions, including those related to grazing impacts on soil carbon. Derner et al. (2019) found that grazing does not significantly influence soil carbon levels in the Great Plains—a finding contested by Ren et al. (2024). Our analysis similarly finds no systematic relationship between  $\Delta c_{\text{Soil}}$  and models that implement grazing (see Table 1). This lack of alignment suggests that LUC effects on soil carbon in grazing systems may be highly model-dependent, underlining the complex interactions between LUC and regional soil carbon responses."*

13. Line 731-734: This explanation isn't clear to me. Also, what are the authors finding here about CESM2? Many of these paragraphs emphasize prior work but it isn't clear what is a new insight from this work.

**Response:** *Thank you for highlighting the need for clarity. We have modified this to substantiate our claims and make our findings more pronounced. The refined statement reads thus: "We find that BCC and CESM2 are unique among the models in their responses to the gross versus net transition approach to LUC. BCC, which uses gross transitions, simulates carbon gain due to LUC, while CESM2, —which employs net transitions, —shows a high carbon loss, comparable in magnitude to models using gross transitions. This suggests that while the distinction between gross and net transitions generally explains model responses to LUC, it does not fully account for the behaviour observed in BCC and CESM2, indicating that additional processes likely influence these outcomes.*

*Building on this observation, we note here that CESM2 stands out as one of the few models in our study (alongside EC-Earth3 models) that explicitly implements irrigation, a factor we find to correlate with high land CO<sub>2</sub> flux estimates (Table 2). Our results suggest that irrigation could also be a contributing factor to the large carbon fluxes in CESM2, as irrigation has been shown in previous studies to increase LUC-related carbon fluxes (Qin et al., 2024; Roy et al., 2022; Taheripour et al., 2013) in addition to its BGP impacts on the land surface (De Hertog et al., 2023; Al-Yaari et al., 2022; de Vrese and Hagemann, 2018). According to de Vrese and Hagemann (2018), irrigation introduces heterogeneity within grid cells by increasing water availability in one part of the cell, creating sharp contrasts in land surface characteristics. This unique heterogeneity could help explain why CESM2's response to LUC differs from other models and why it shows high carbon loss despite using net transitions. Our findings thus highlight that model configurations like irrigation and the choice between gross versus net transitions interact in complex ways, affecting carbon flux outcomes in ways*

*not solely attributable to LUC representation.”*

14. Line 745: "this underscores" I'm not sure what this is referring to? Is this a finding of this paper or of prior work?

**Response:** *Thank you for highlighting the need for clarity. We have clarified the statement here and it now reads “According to Hartung et al. (2021), this contribution is larger than the uncertainty in LUC flux estimates, which affects cumulative the LUC flux by up to 22%. Together with these findings, our analysis highlights the necessity of including wood harvest in ESMs to achieve more accurate carbon flux estimations.”*
